# Supplementary material for: Six Serum-Based miRNAs as Potential Diagnostic Biomarkers for Gastric Cancer
Source: Oxford University Press journal article supplement (doi:10.1158/1055-9965.epi-16-0607), 2016-10-18

**Supplementary Data**

**Six Serum-Based miRNAs as Potential Diagnostic Biomarkers for Gastric Cancer**

Zebo Huang, Danxia Zhu, Lirong Wu, Mingfeng He, Xin Zhou, Lan Zhang, Huo Zhang, Weiwei Wang, Jun Zhu, Wenfang Cheng, Yan Chen, Yong Fan, Lian-wen Qi, Yin Yin, Wei Zhu, Yongqian Shu, Ping Liu.

| **Table S1. Differently expressed miRNAs in the screening phase** | | | | |
| --- | --- | --- | --- | --- |
| MiRNA | Fold change | | | Mean fold |
| Pool 1 | Pool 2 | Pool 3 |
| **let-7a-5p** | 3.65 | 2.04 | 1.52 | 2.40 |
| let-7b-3p | 1.81 | 1.90 | 1.89 | 1.87 |
| let-7c | 1.59 | 1.61 | 2.47 | 1.89 |
| let-7i-3p | 2.98 | 2.10 | 2.02 | 2.37 |
| **miR-106b-5p** | 2.12 | 2.70 | 1.59 | 2.14 |
| **miR-10b-5p** | 12.41 | 16.13 | 8.27 | 12.27 |
| **miR-132-3p** | 2.13 | 8.26 | 2.04 | 4.15 |
| miR-140-5p | 3.08 | 2.43 | 2.95 | 2.82 |
| miR-141-3p | 4.66 | 3.58 | 4.47 | 4.24 |
| miR-144-3p | 2.36 | 3.44 | 2.26 | 2.69 |
| miR-144-5p | 3.20 | 3.99 | 3.07 | 3.42 |
| miR-146b-5p | 5.16 | 2.75 | 4.94 | 4.28 |
| miR-154-5p | 3.42 | 2.34 | 2.07 | 2.61 |
| **miR-155-5p** | 3.35 | 3.61 | 9.91 | 5.62 |
| **miR-15b-3p** | 2.57 | 2.11 | 2.47 | 2.38 |
| miR-15b-5p | 2.89 | 2.11 | 1.87 | 2.29 |
| miR-16-2-3p | 3.31 | 3.75 | 2.21 | 3.09 |
| miR-17-5p | 2.80 | 6.69 | 2.68 | 4.06 |
| **miR-185-5p** | 2.89 | 2.59 | 3.02 | 2.83 |
| **miR-192-5p** | 2.98 | 1.86 | 2.51 | 2.45 |
| miR-194-5p | 1.89 | 2.86 | 1.92 | 2.22 |
| **miR-195-5p** | 6.77 | 3.68 | 3.29 | 4.58 |
| miR-199a-5p | 2.27 | 1.85 | 2.13 | 2.08 |
| miR-19b-3p | 2.14 | 1.96 | 1.88 | 1.99 |
| miR-200a-3p | 6.94 | 2.36 | 6.65 | 5.32 |
| miR-200c-3p | 2.66 | 12.65 | 2.55 | 5.95 |
| miR-205-5p | 3.94 | 4.13 | 1.71 | 3.26 |
| **miR-20a-3p** | 2.62 | 3.83 | 2.35 | 2.93 |
| miR-20b-5p | 1.80 | 1.72 | 1.93 | 1.82 |
| **miR-210** | 3.44 | 4.04 | 3.29 | 3.59 |
| miR-21-5p | 3.66 | 2.20 | 2.43 | 2.76 |
| miR-28-5p | 3.30 | 5.26 | 3.17 | 3.91 |
| **miR-296-5p** | 5.44 | 5.05 | 5.21 | 5.23 |
| miR-29a-5p | 3.28 | 2.20 | 3.14 | 2.87 |
| miR-29b-2-5p | 2.64 | 2.69 | 2.52 | 2.62 |
| miR-29c-3p | 2.50 | 1.93 | 1.67 | 2.03 |
| miR-30e-3p | 2.10 | 2.65 | 2.43 | 2.39 |
| miR-32-5p | 1.79 | 1.92 | 1.70 | 1.80 |
| miR-331-3p | 2.21 | 2.64 | 2.11 | 2.32 |
| miR-339-5p | 2.00 | 2.42 | 1.77 | 2.06 |
| miR-346 | 1.56 | 1.57 | 3.23 | 2.12 |
| **miR-34a-5p** | 2.08 | 1.99 | 2.23 | 2.10 |
| miR-361-3p | 2.23 | 2.10 | 2.14 | 2.16 |
| **miR-451a** | 3.34 | 2.59 | 2.09 | 2.67 |
| miR-486-5p | 2.38 | 2.12 | 2.18 | 2.23 |
| miR-501-3p | 2.11 | 8.78 | 4.91 | 5.27 |
| miR-532-5p | 3.02 | 3.33 | 2.55 | 2.97 |
| miR-584-5p | 1.60 | 2.03 | 1.67 | 1.77 |
| miR-766-3p | 1.97 | 2.18 | 1.82 | 1.99 |
| miR-92a-3p | 1.71 | 1.89 | 1.62 | 1.74 |
| miR-95 | 3.74 | 5.06 | 3.58 | 4.13 |
| miR-1 | -2.92 | -3.25 | -3.31 | -3.16 |
| miR-182-5p | -4.29 | -3.33 | -2.29 | -3.30 |
| miR-223-5p | -1.88 | -3.11 | -2.74 | -2.58 |
| miR-409-3p | -6.10 | -5.01 | -2.71 | -4.61 |
| miR-421 | -6.22 | -2.54 | -4.93 | -4.56 |
| miR-551b-3p | -4.94 | -4.77 | -1.93 | -3.88 |
| miR-885-5p | -2.57 | -2.52 | -2.72 | -2.60 |

**Note:** miRNAs in bold and underline were identified after the training phase.

| **Table S2. Clinical characteristics of 188 GC patients who provided tissue samples** | | | |
| --- | --- | --- | --- |
|  | **Variables** | **N (%)** |  |
|  | **Age (mean ± SD)** | 59.61 ± 11.50 |  |
|  | **Gender** | |  |
|  | Male | 134 (71.3) |  |
|  | Female | 54 (28.7) |  |
|  | **Differentiation grade** | |  |
|  | Well/moderate | 123 (65.4) |  |
|  | Poorly | 65 (34.6) |  |
|  | **Tumor size** | |  |
|  | ≤ 3cm | 86 (45.7) |  |
|  | > 3cm | 102 (54.3) |  |
|  | **TNM stage** | |  |
|  | I | 55 (29.3) |  |
|  | II | 38 (20.2) |  |
|  | III | 93 (49.5) |  |
|  | IV | 2 (1.0) |  |
|  | **Adjuvant chemotherapy** | |  |
|  | No | 55 (29.3) |  |
|  | Yes | 133 (70.7) |  |
|  | **Deceased** | |  |
|  | No | 145 (77.1) |  |
|  | Yes | 43 (23.9) |  |

| **Table S3. Clinical characteristics of 55 GC patients without adjuvant chemotherapy** | | | |
| --- | --- | --- | --- |
|  | **Variables** | **N (%)** |  |
|  | **Age (mean ± SD)** | 62.00 ± 11.92 |  |
|  | **Gender** | |  |
|  | Male | 41 (74.5) |  |
|  | Female | 14 (25.5) |  |
|  | **Differentiation grade** | |  |
|  | Well/moderate | 37 (67.3) |  |
|  | Poorly | 18 (32.7) |  |
|  | **Tumor size** | |  |
|  | ≤ 3cm | 35 (63.6) |  |
|  | > 3cm | 20 (36.4) |  |
|  | **TNM stage** | |  |
|  | I | 28 (50.9) |  |
|  | II | 11 (20.0) |  |
|  | III | 16 (29.1) |  |
|  | **Deceased** | |  |
|  | No | 46 (83.6) |  |
|  | Yes | 9 (16.4) |  |

**Figure S1** Expression levels of the six miRNAs in the serum of GC patients and NCs in the training and validation phases, respectively. A: miR-10b-5p; B: miR-132-3p; C: miR-185-5p; D: miR-195-5p; E: miR-20a-3p; F: miR-296-5p; N: normal controls; T: tumor. The whiskers of box plots: Tukey.

**
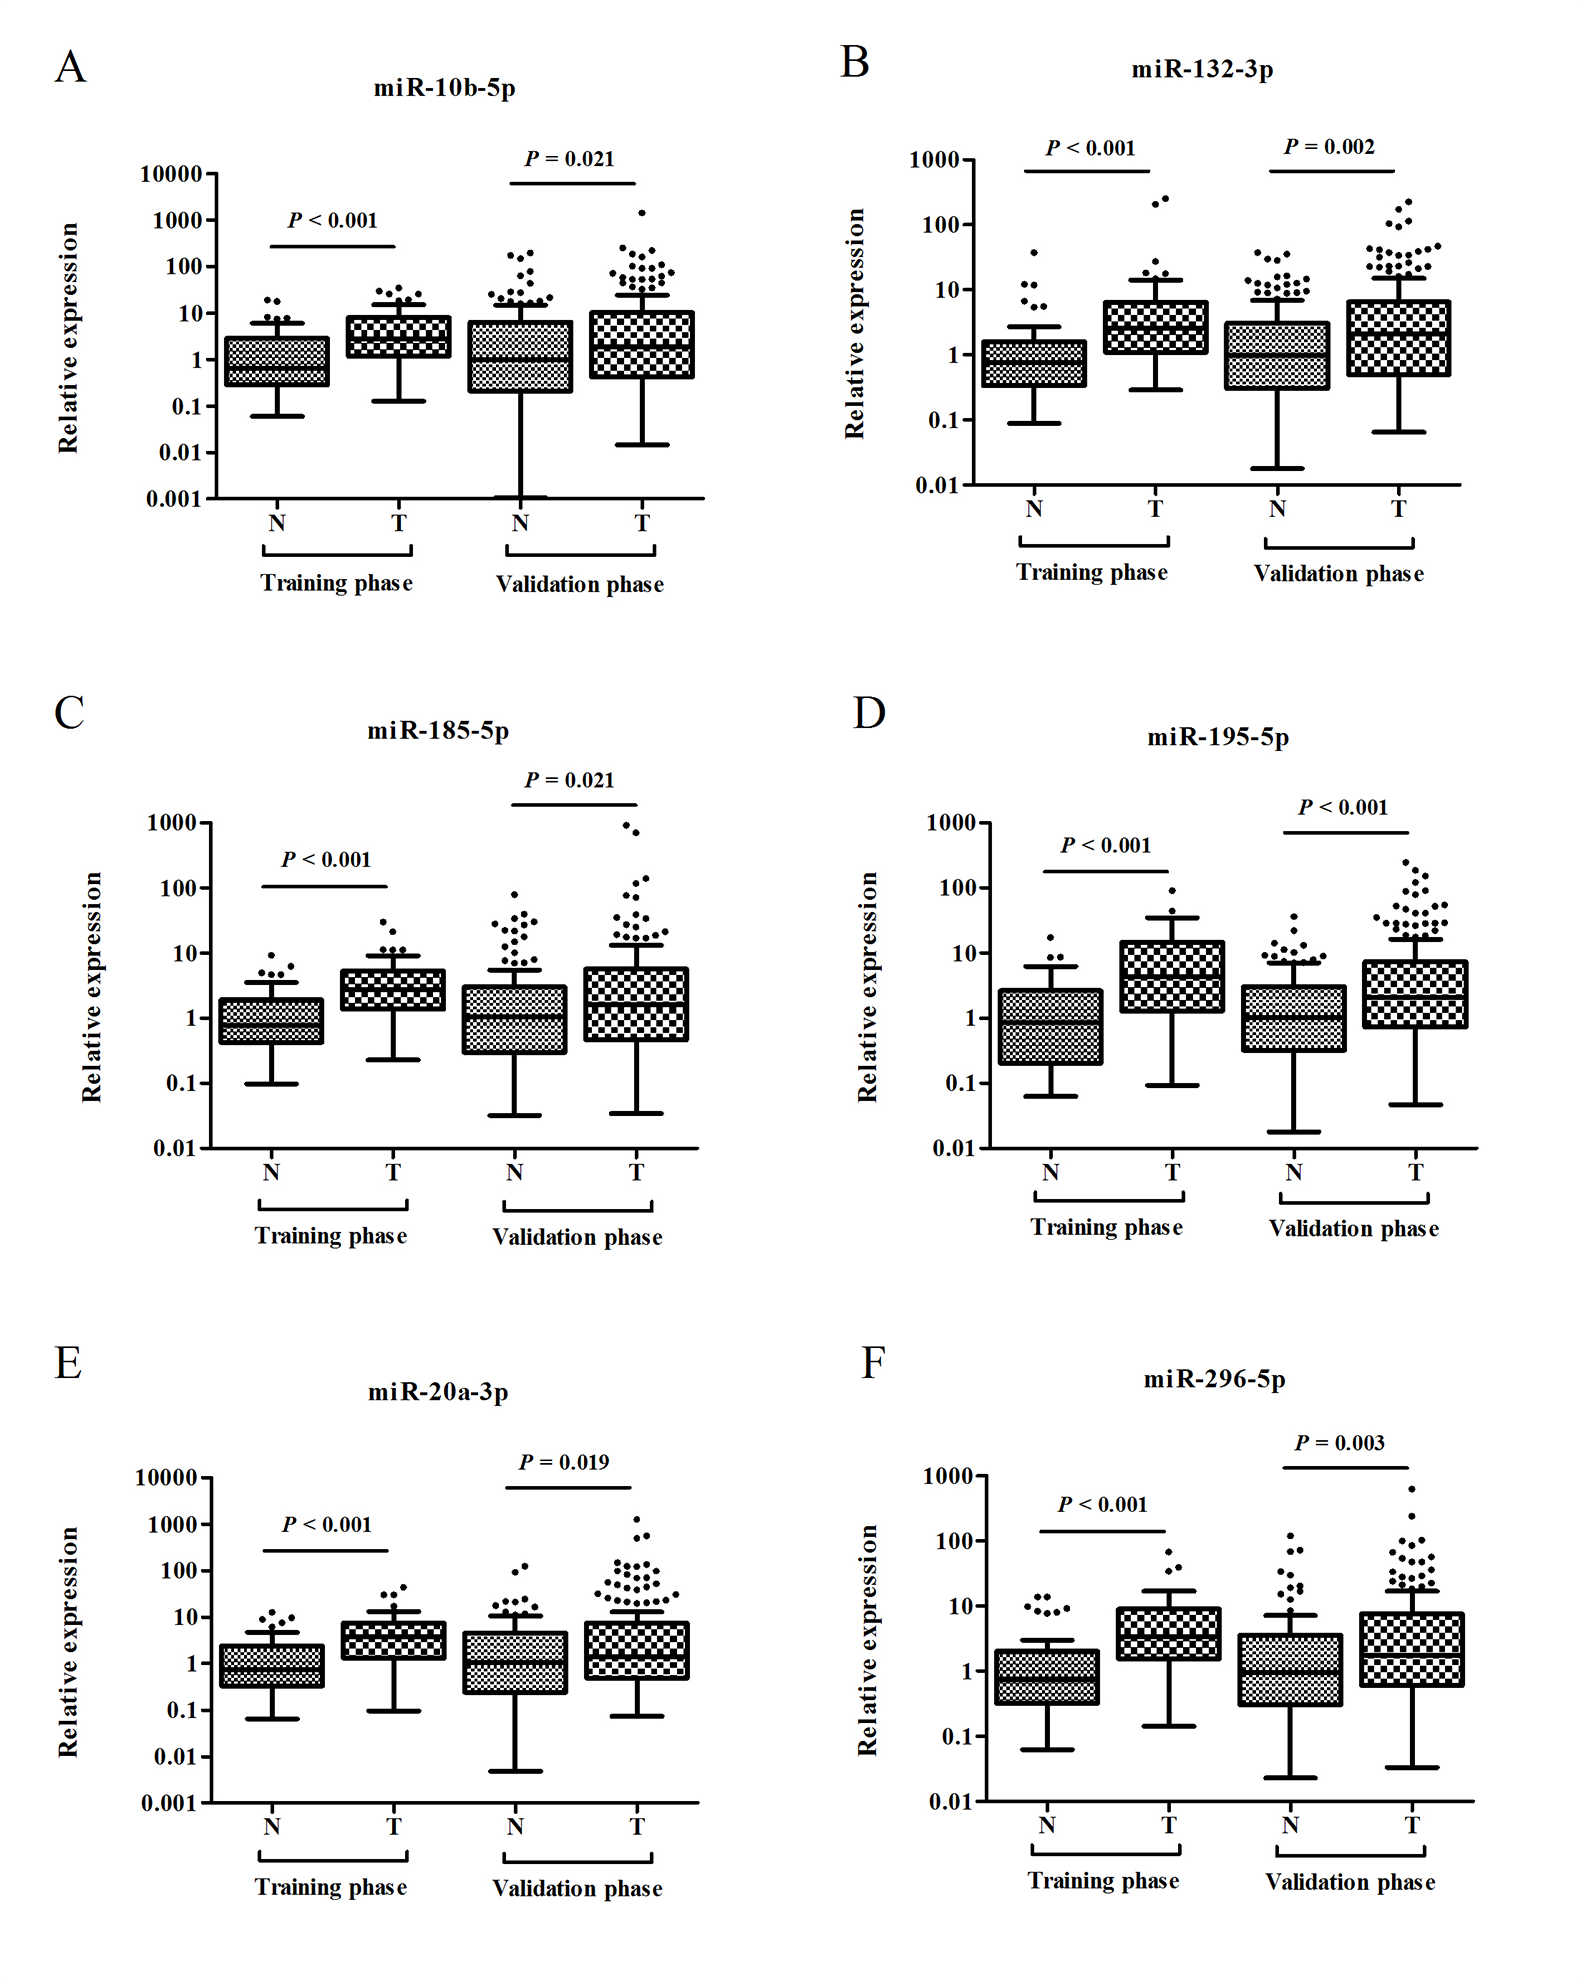
**

**Figure S2** ROC curve analyses of each miRNA to discriminate GC patients from NCs in the combined two phases.


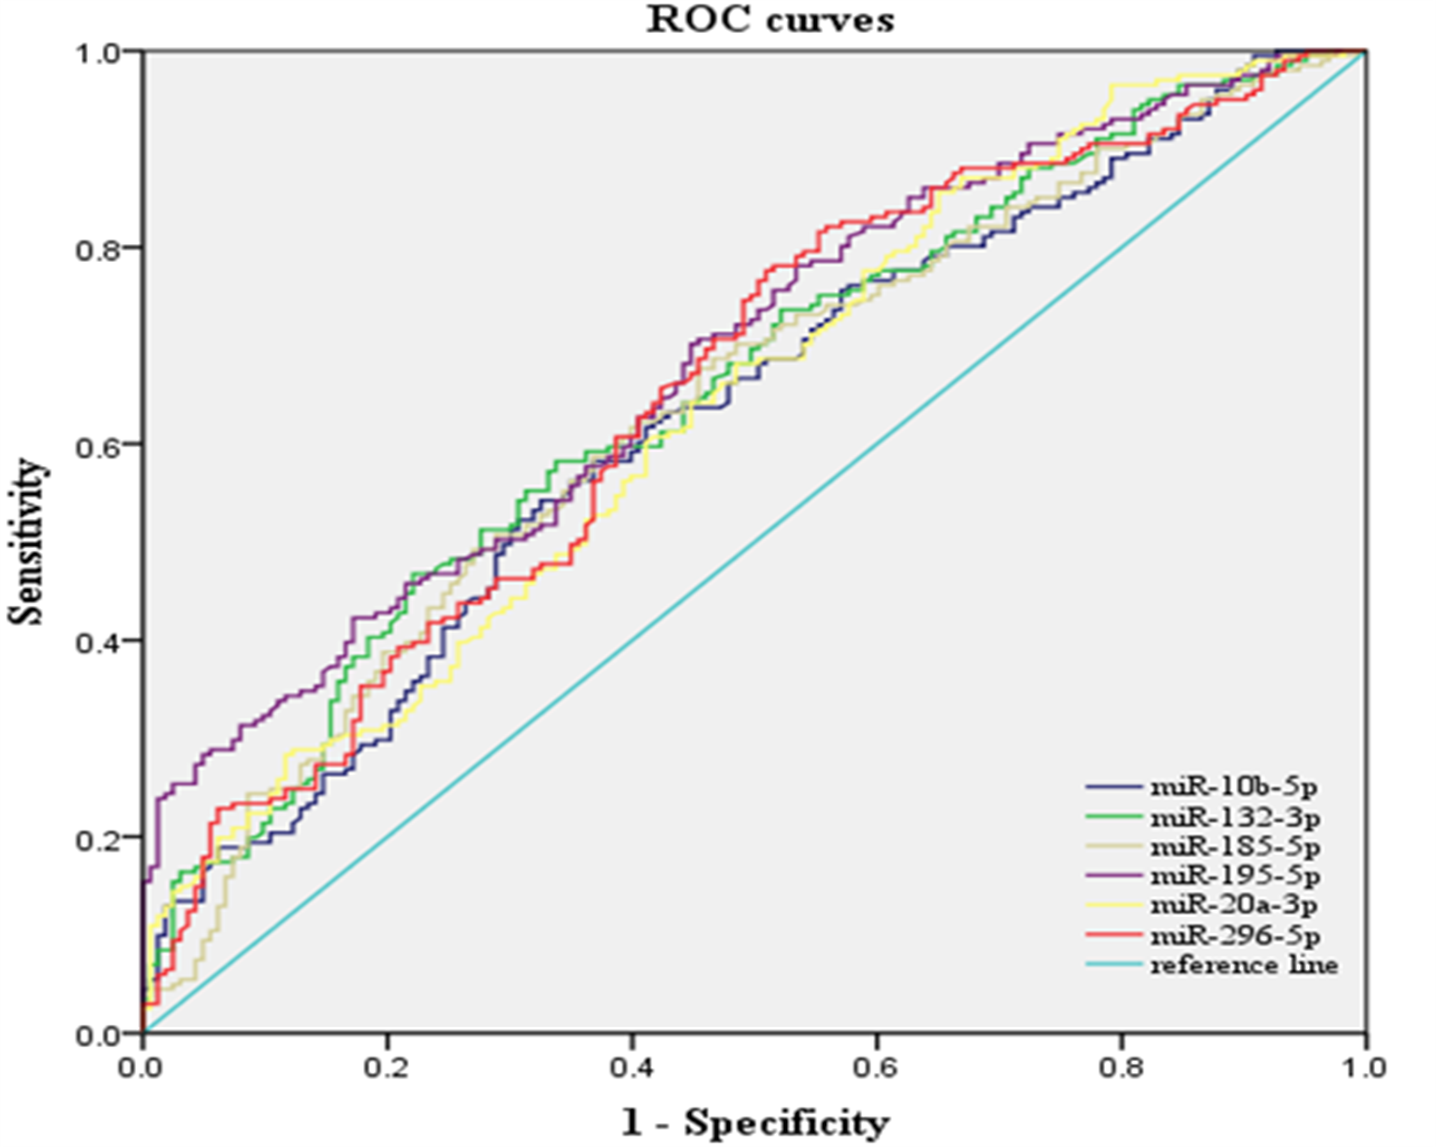


**Figure S3** Comparison of the six miRNAs in serum of GC patients diagnosed with early (I+ II; n= 89) and late (III+ IV; n= 114) stage disease. A: miR-10b-5p; B: miR-132-3p; C: miR-185-5p; D: miR-195-5p; E: miR-20a-3p; F: miR-296-5p; Error bar: standard error.


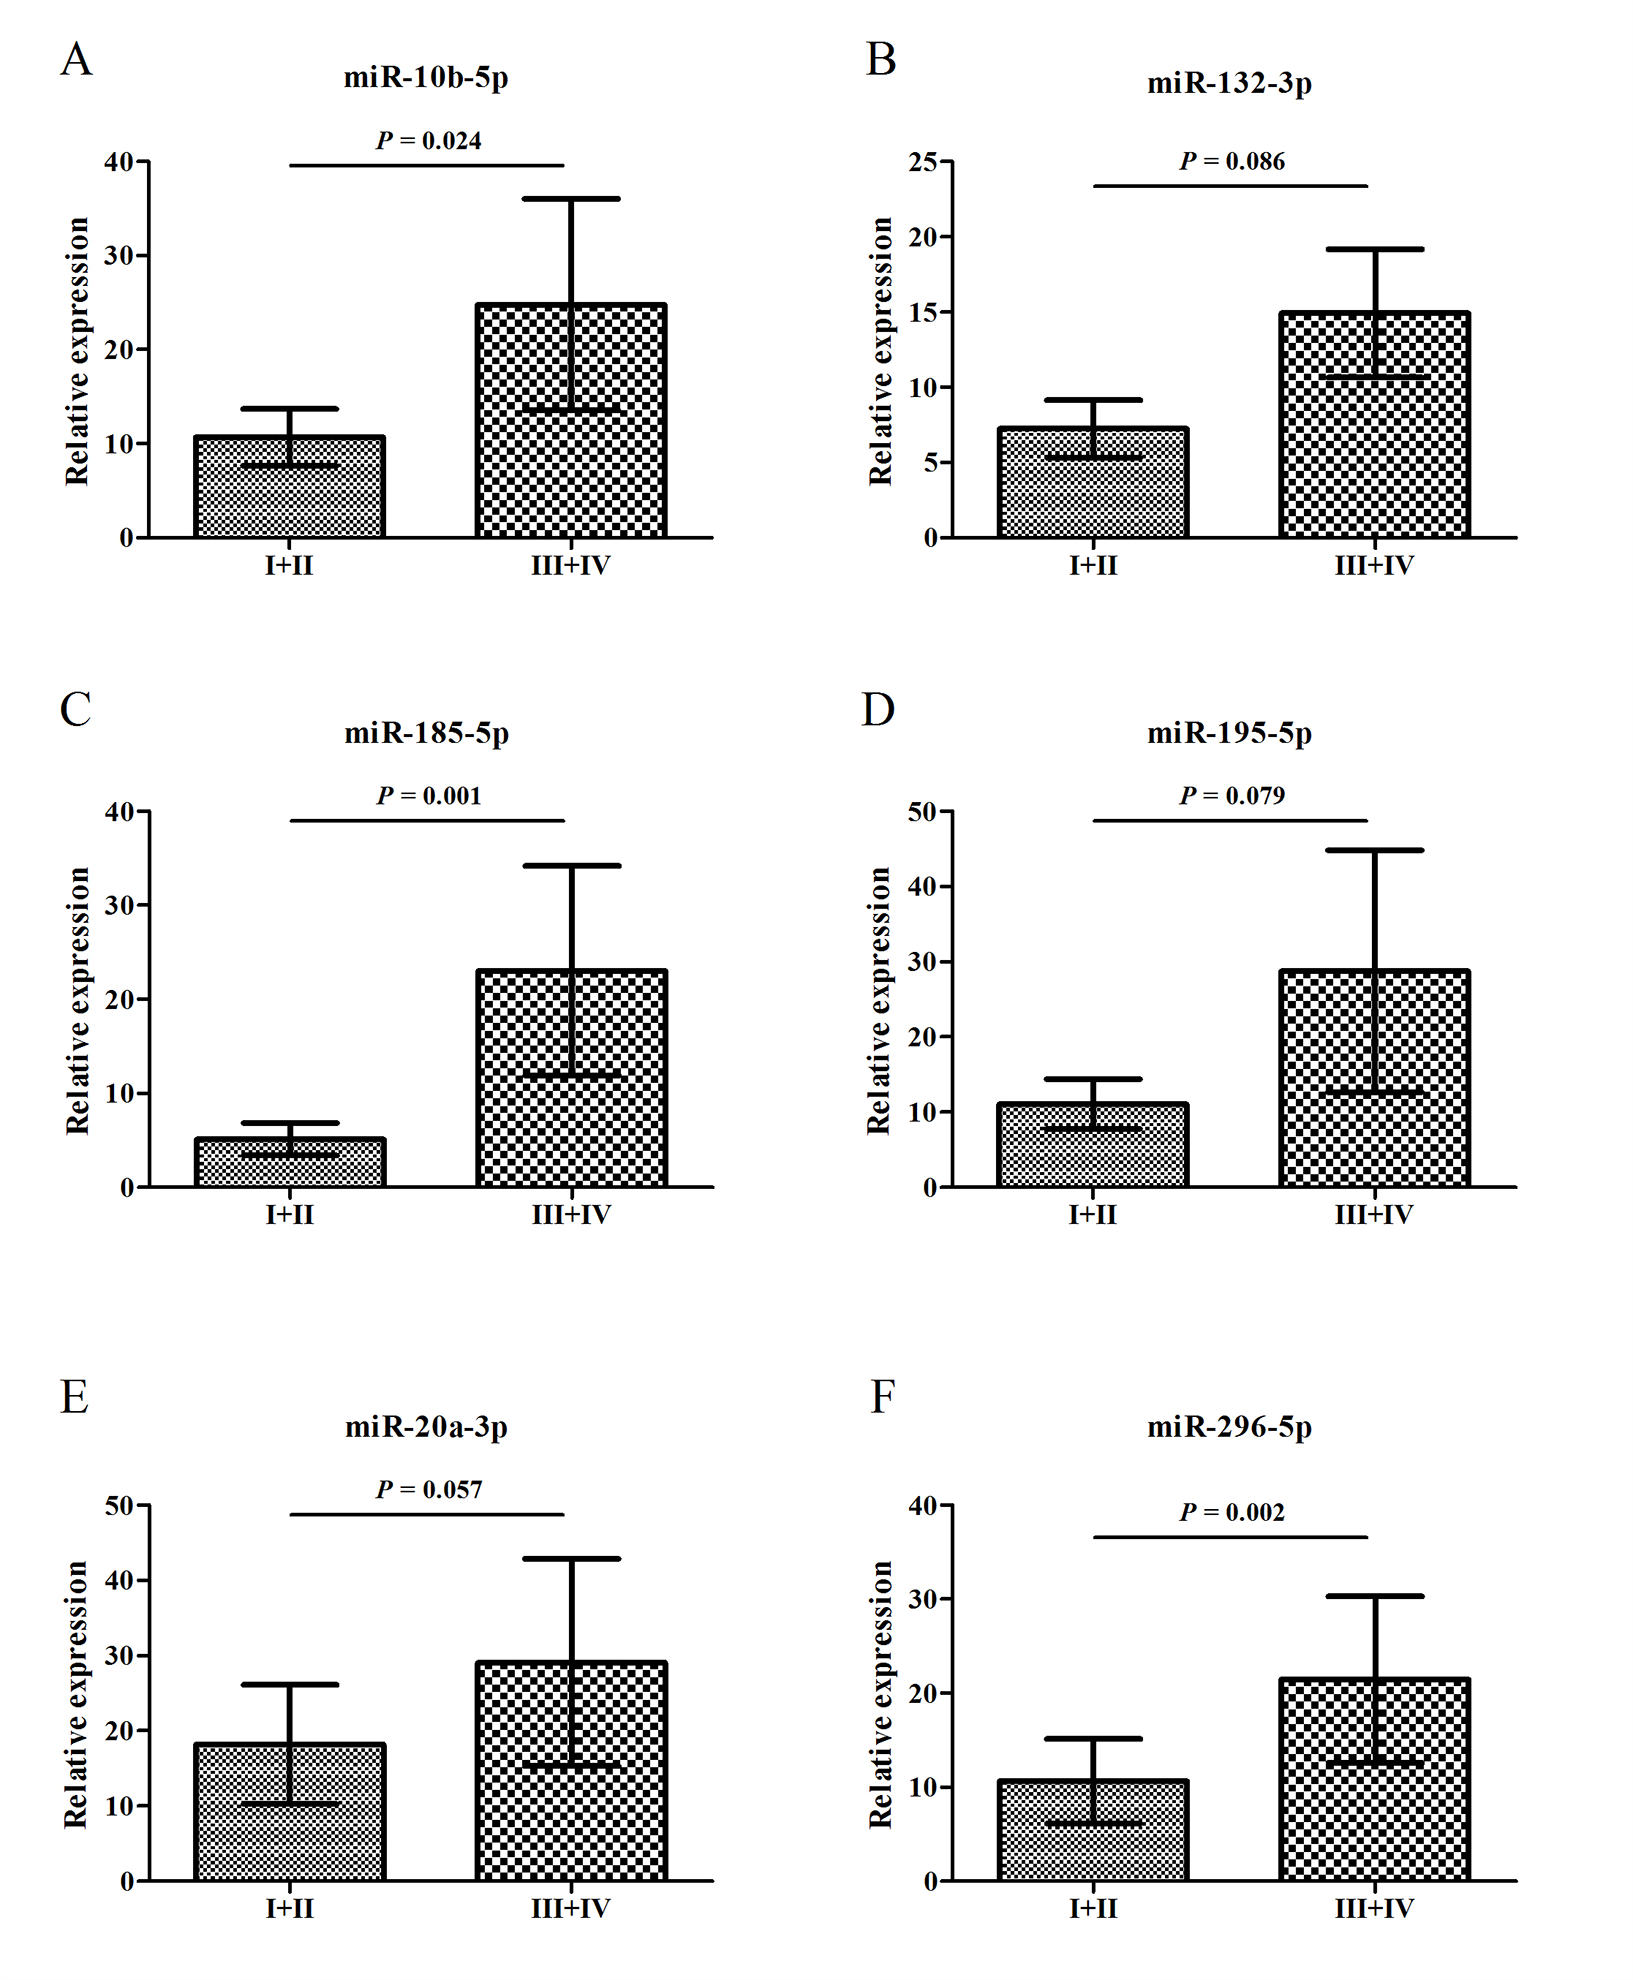


**Figure S4A** Kaplan–Meier curves estimate the association of the six miRNAs and the overall survival of all 188 GC patients.


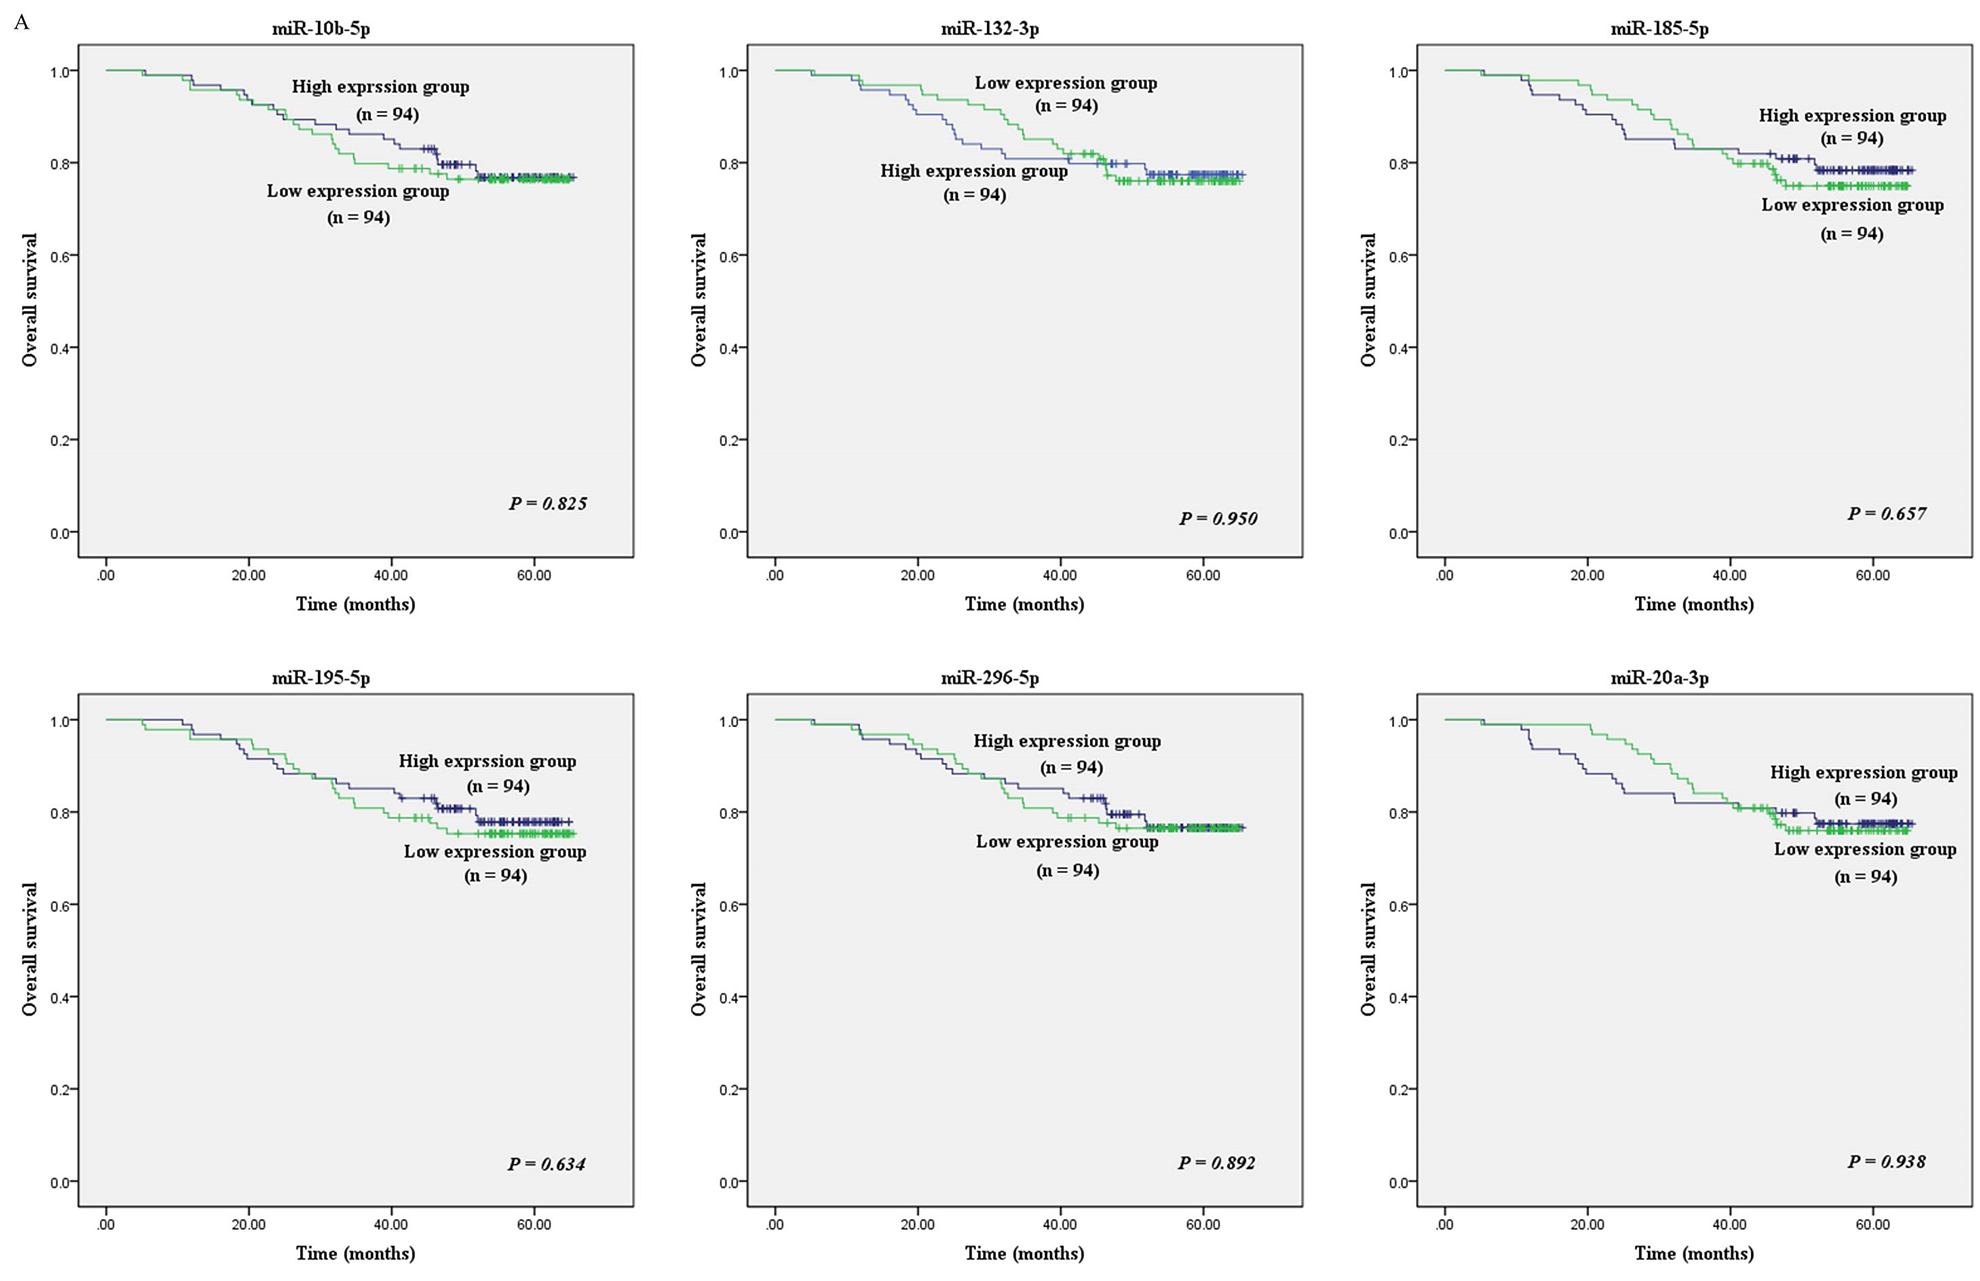


**Figure S4B** Kaplan–Meier curves estimate the association of the six miRNAs and the disease-free survival of all 188 GC patients.


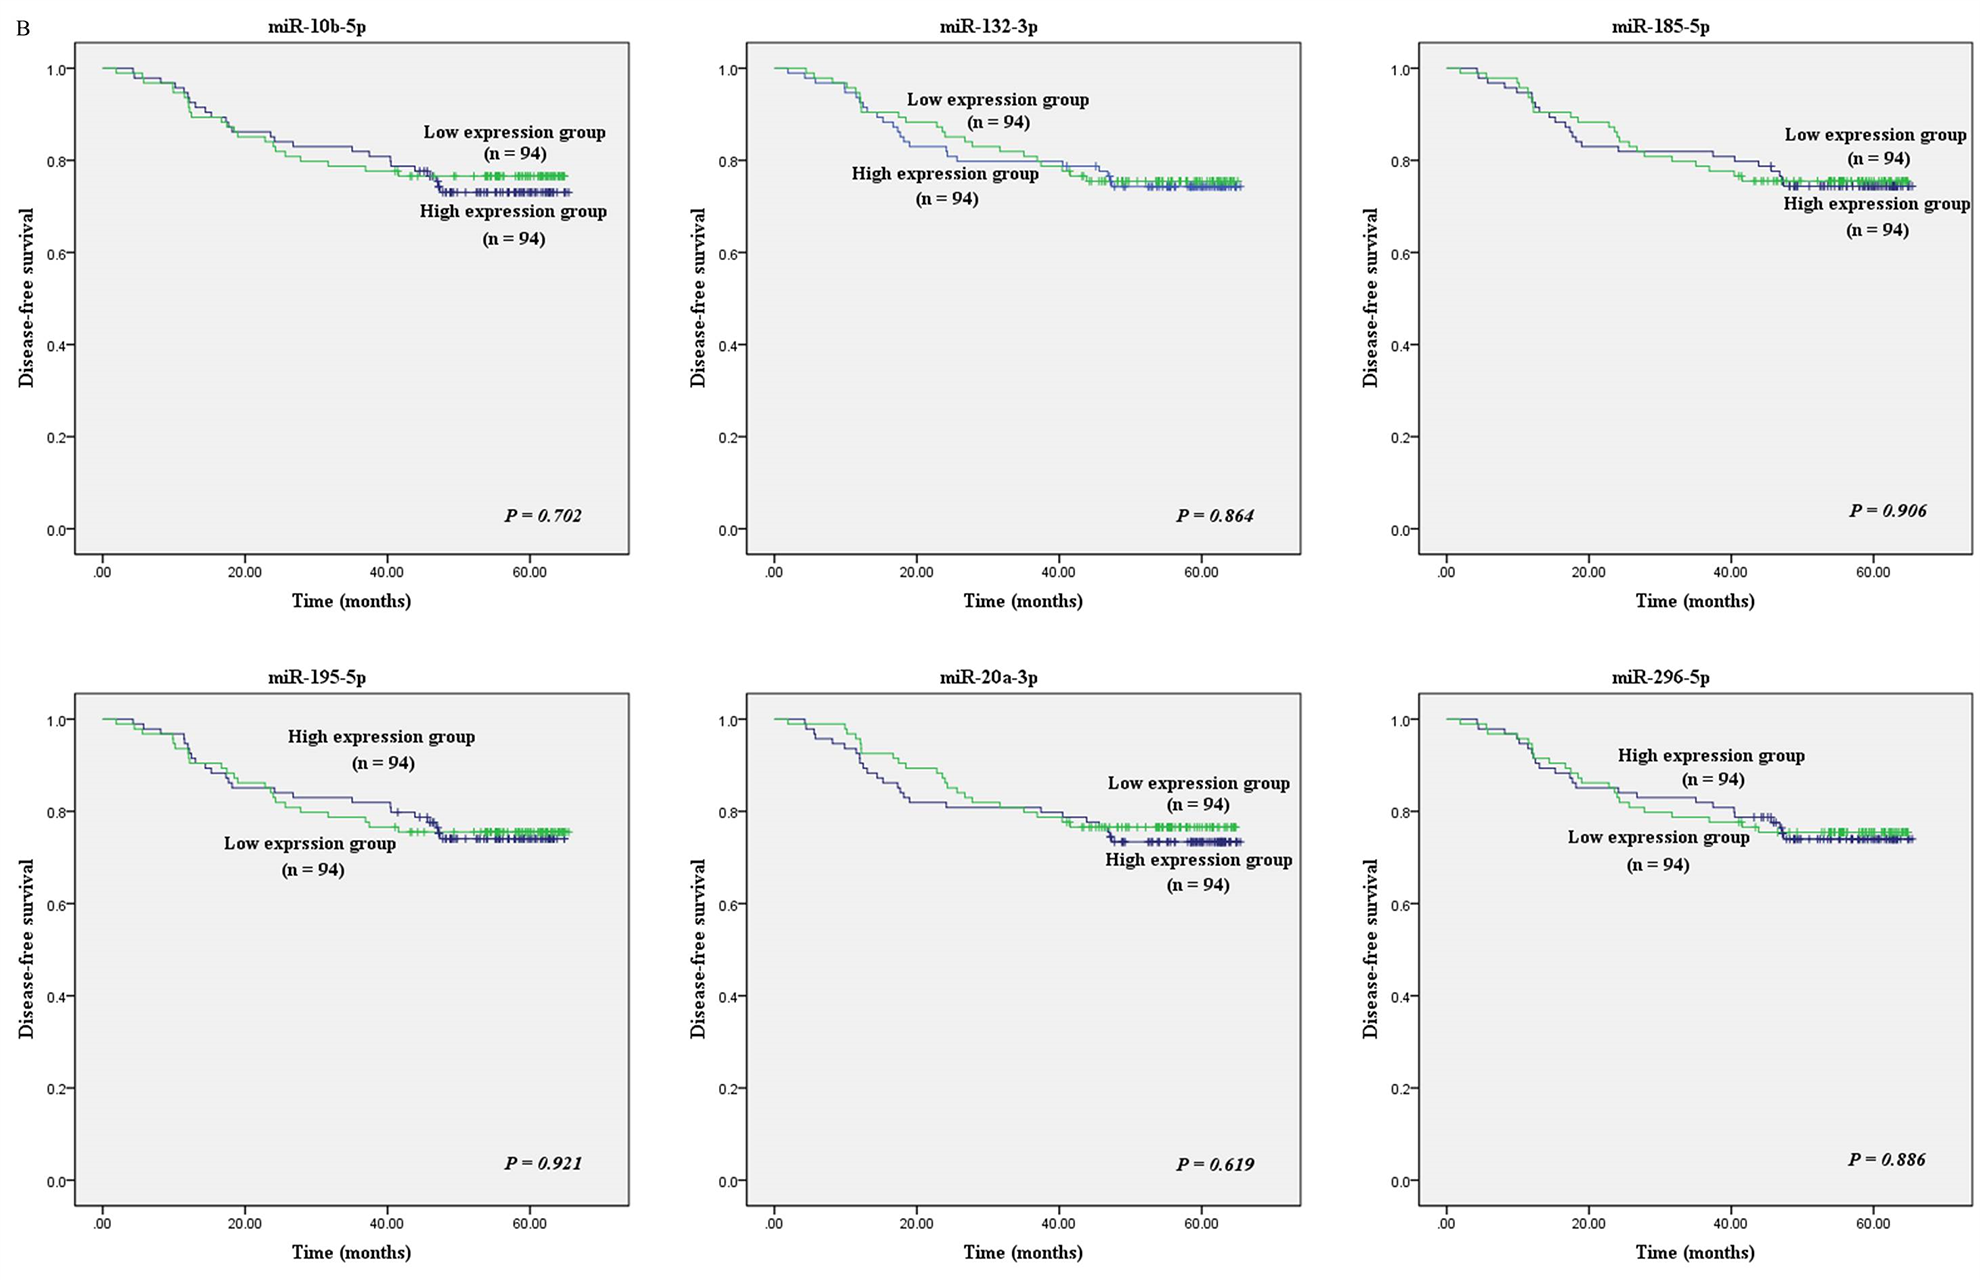


**Figure 5A** Kaplan–Meier curves estimate the association of the six miRNAs and the overall survival of GC patients without adjuvant chemotherapy.


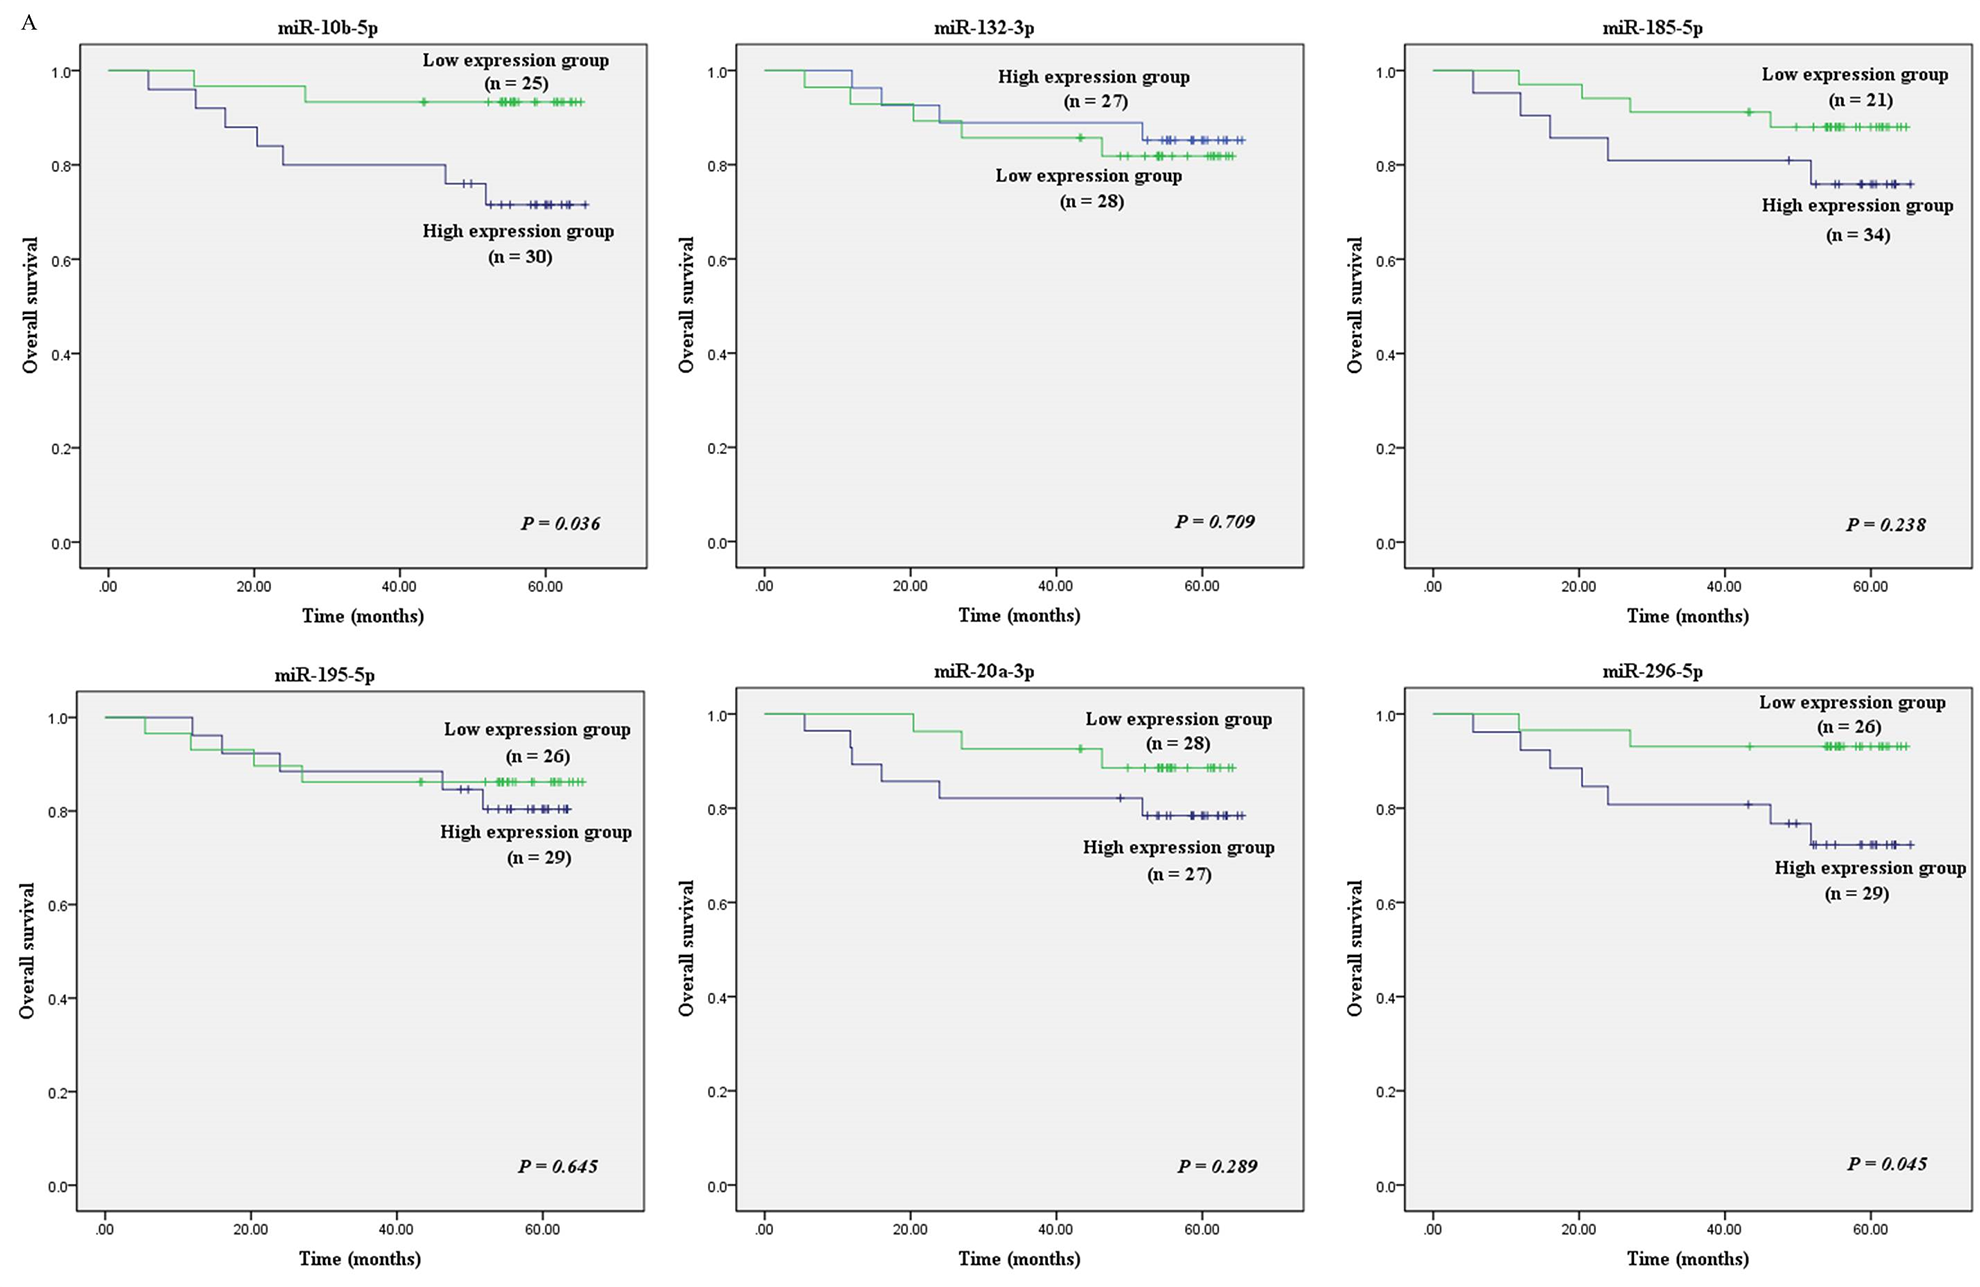


**Figure 5B** Kaplan–Meier curves estimate the association of the six miRNAs and the disease-free survival of GC patients without adjuvant chemotherapy.


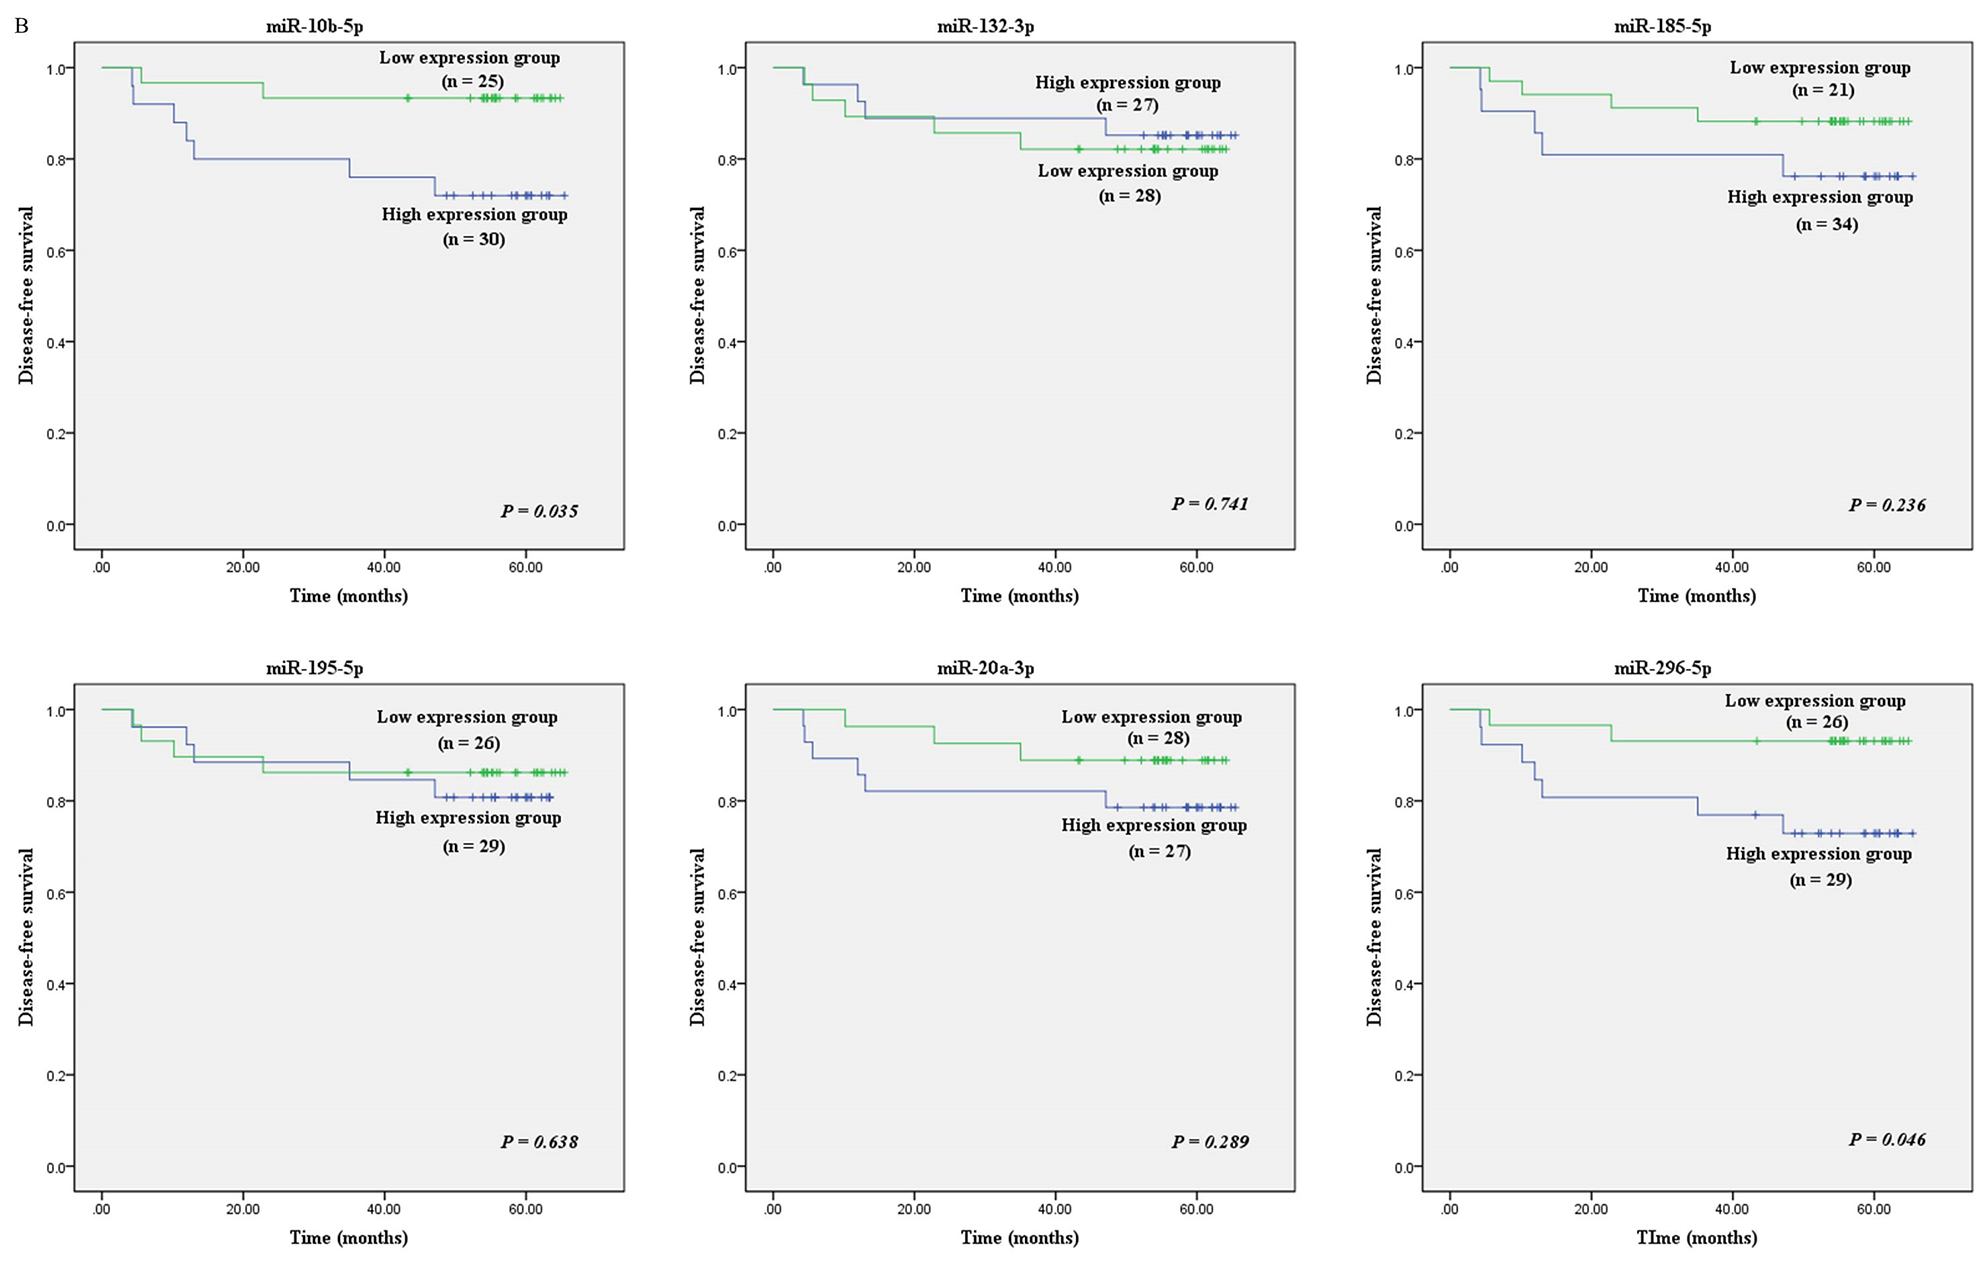


**Figure S6A** Kaplan–Meier curves estimate the association of the six miRNAs and the overall survival of GC patients who received adjuvant chemotherapy.


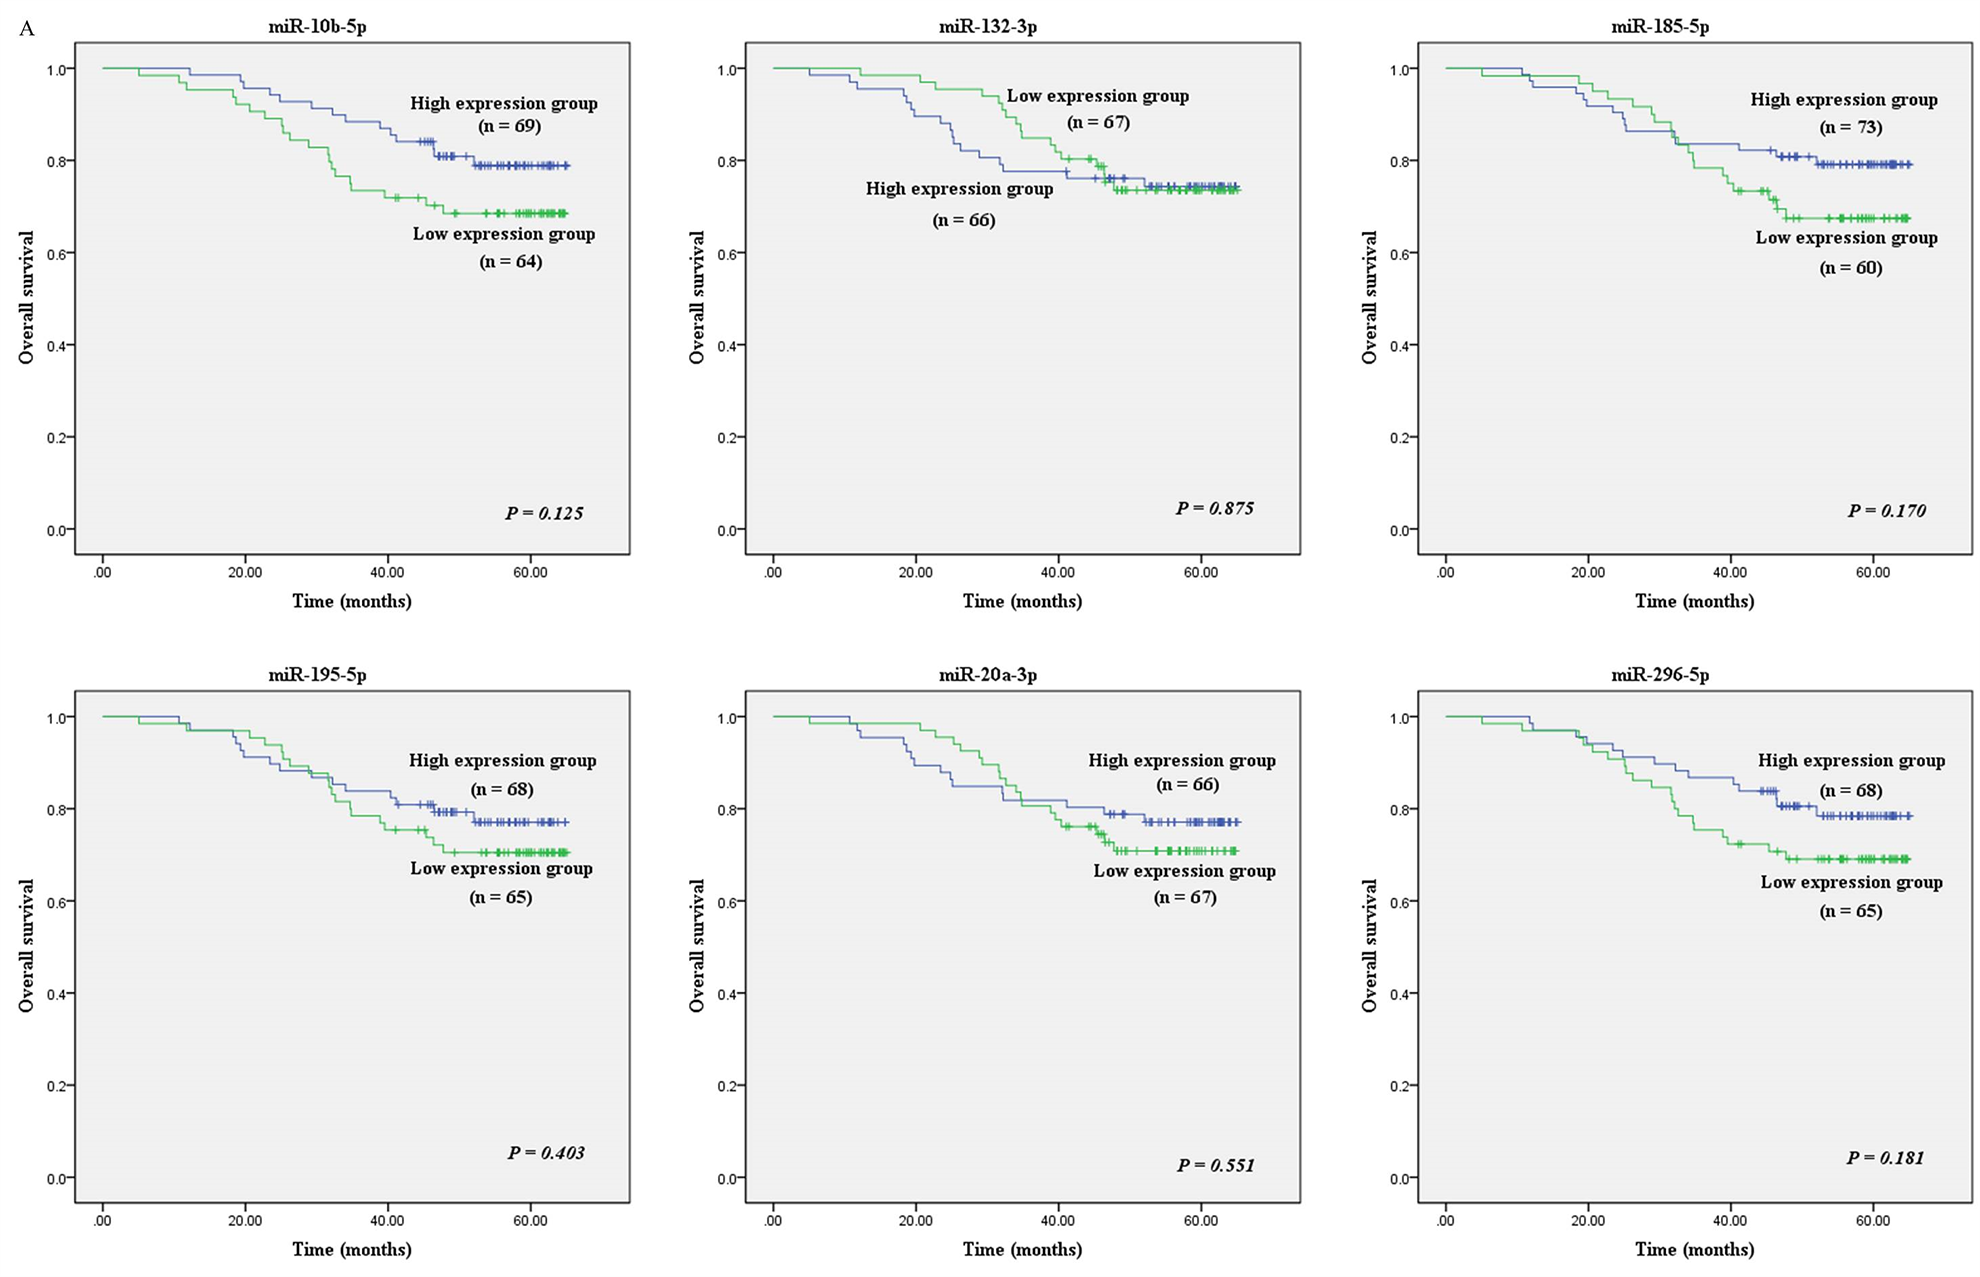


**Figure S6B** Kaplan–Meier curves estimate the association of the six miRNAs and the disease-free survival of GC patients who received adjuvant chemotherapy.


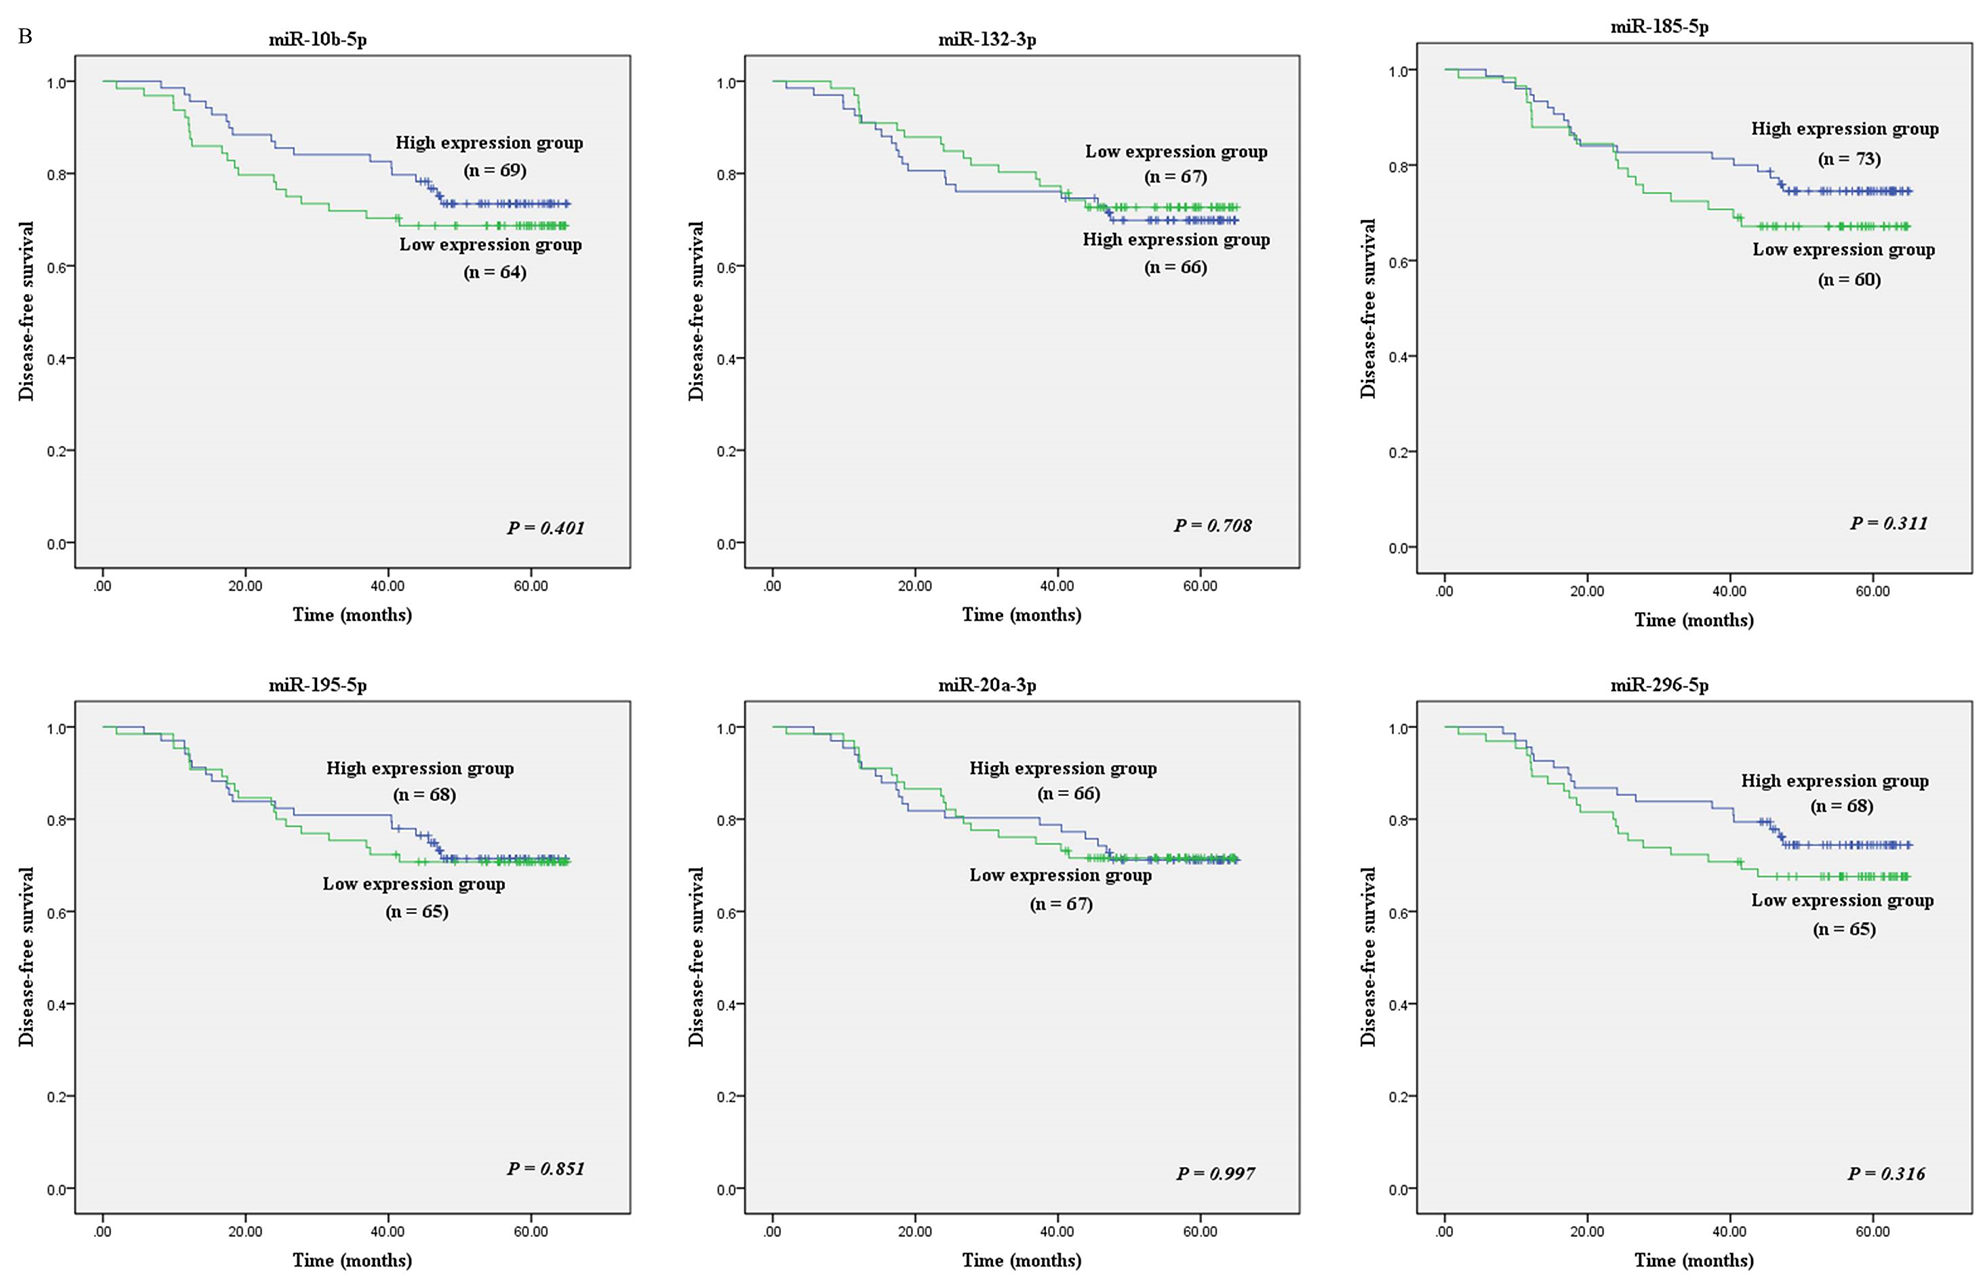


**Figure S7** Comparison of the six miRNAs in 6 arterial serum samples and matched peripheral serum samples.


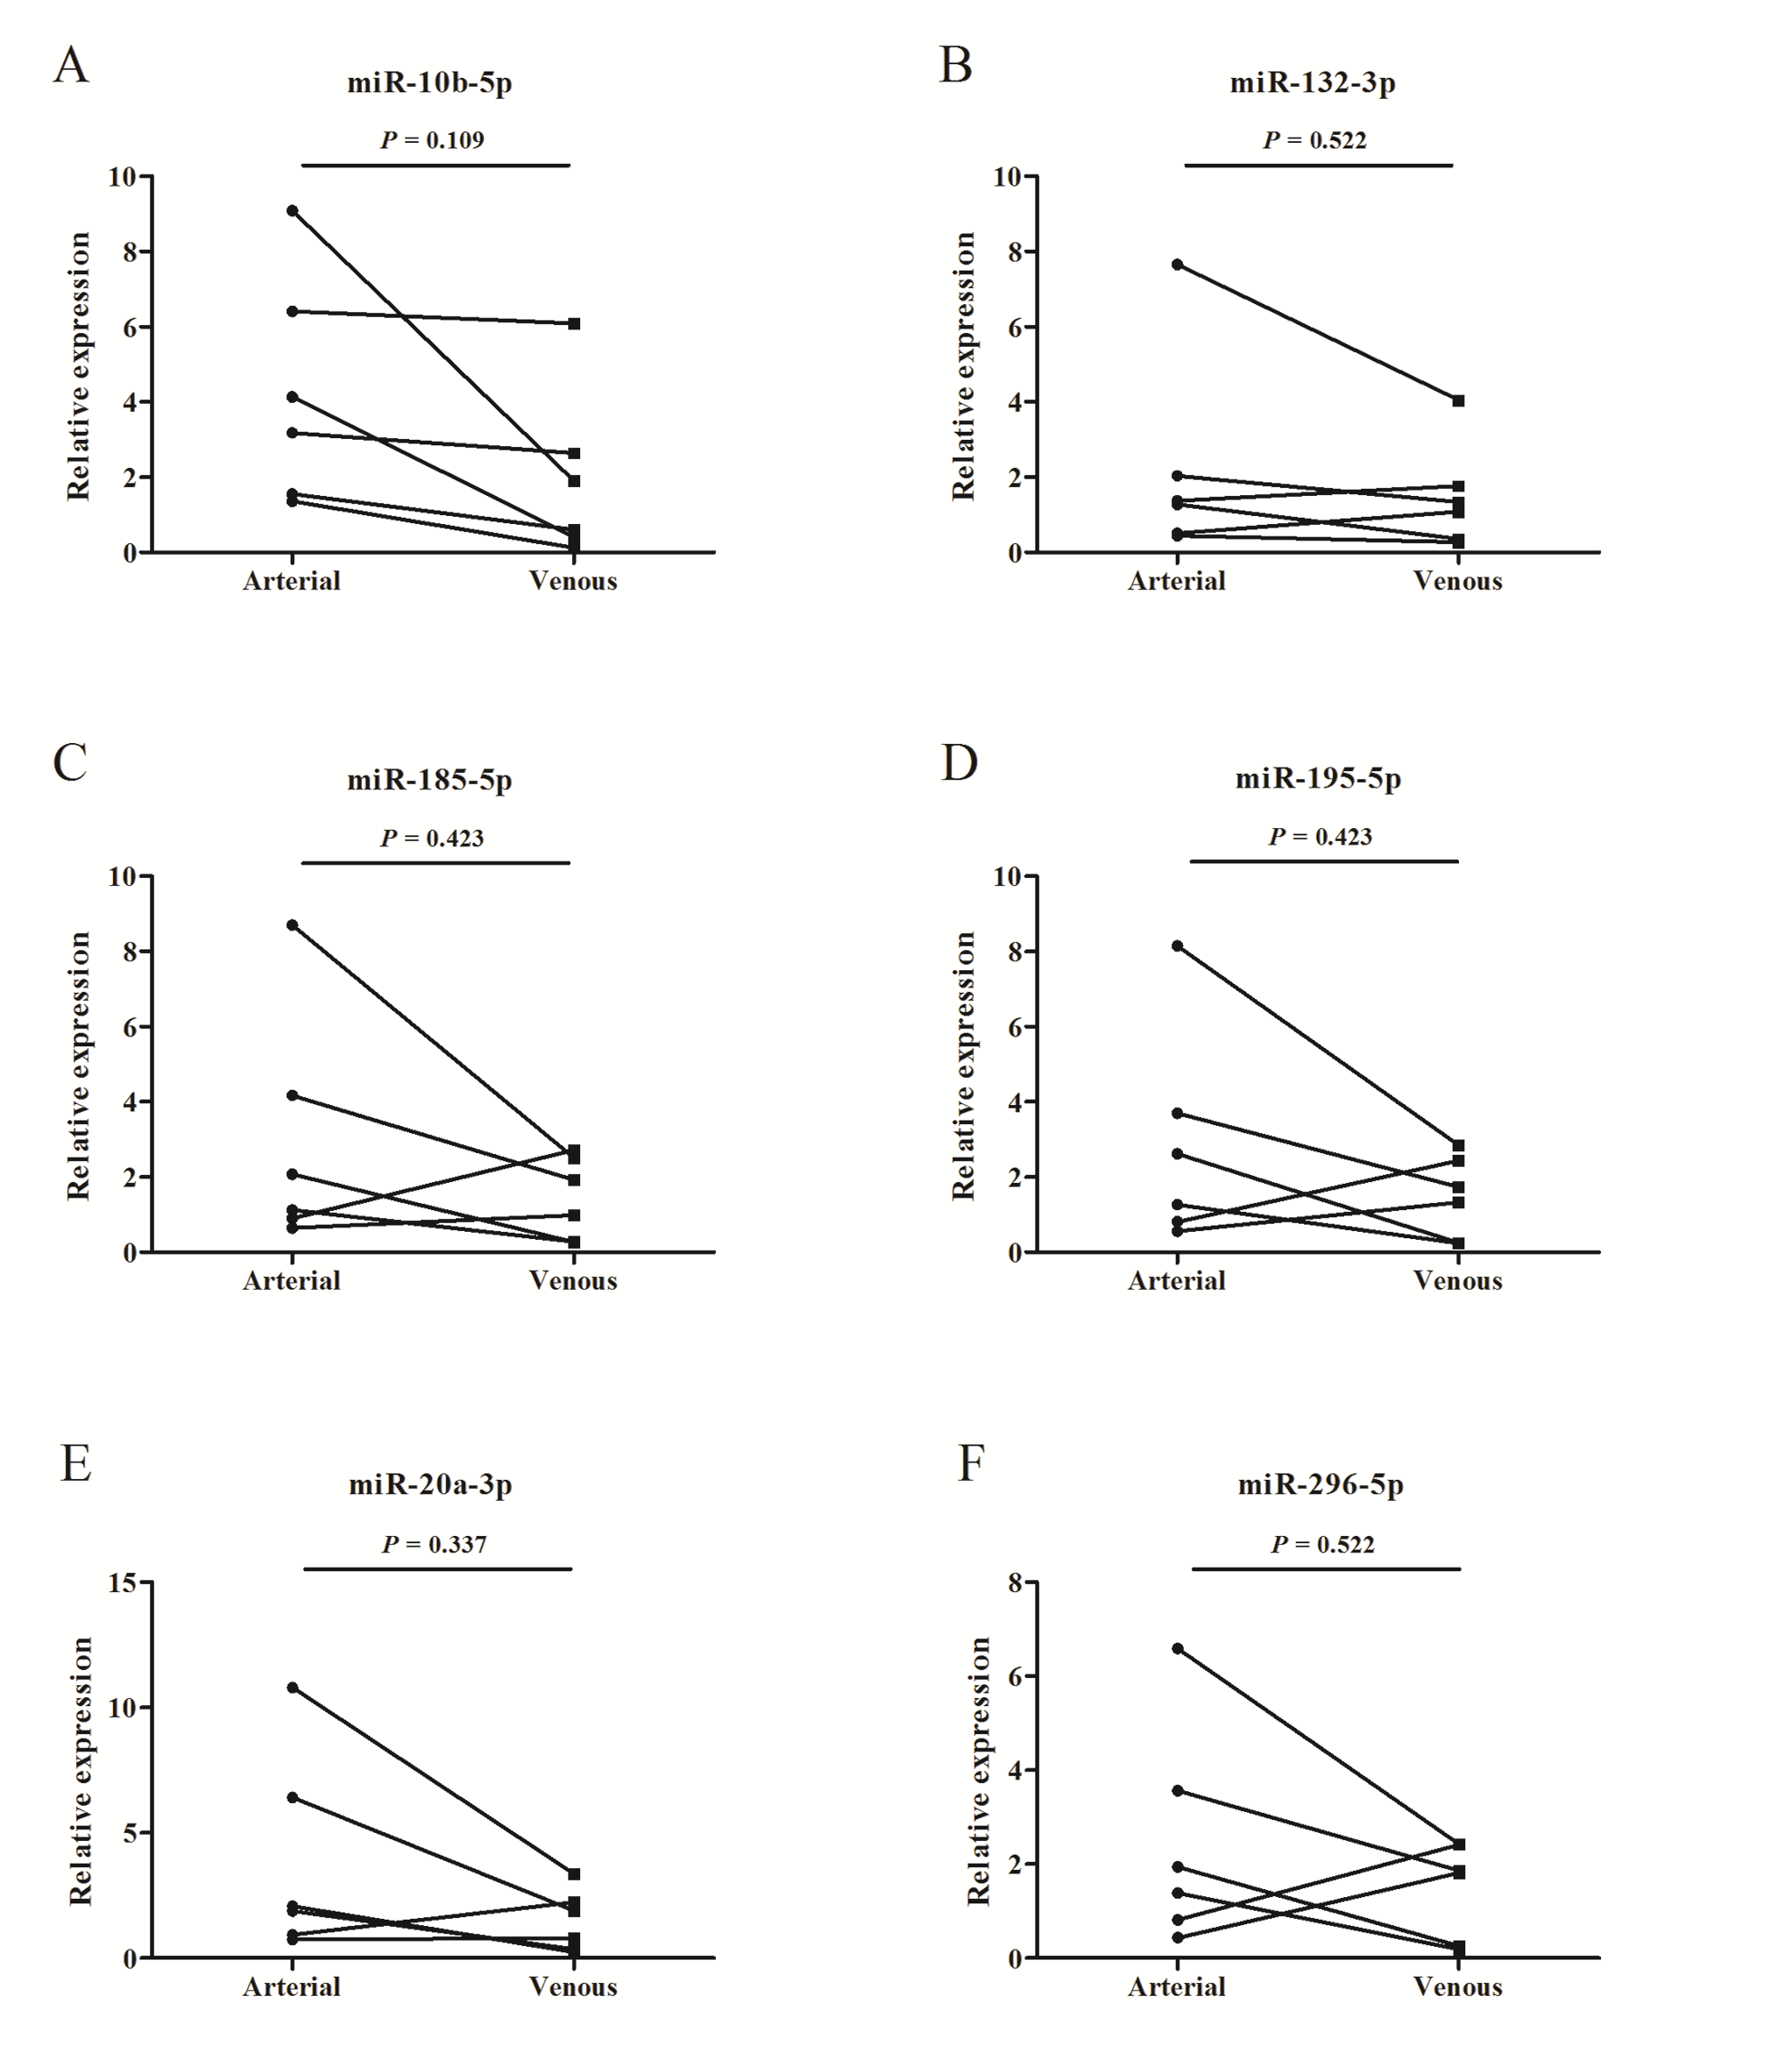

Supplement: 10559965epi160607-sup-169594_2_supp_3661687_md9pym.doc [file 10559965epi160607-sup-169594_2_supp_3661687_md9pym.doc]
